# Supplementary material for: Rare earth-based Cs2NaRECl6 (RE = Tb, Eu) halide double perovskite nanocrystals with multicolor emissions for anticounterfeiting and LED applications
Source: Royal Society of Chemistry journal article supplement (doi:10.1039/d4tc01697a), 2024-01-01
Supplement: d4tc01697a1.pdf [file d4tc01697a1.pdf]

## Supporting Information

### **Rare earth-based Cs<sub>2</sub>NaRECl<sub>6</sub> (RE = Tb, Eu) halide double perovskite nanocrystals with multicolor emissions for anticounterfeiting and LED applications**

Yao Li,<sup>‡ab</sup> Qingxing Yang,<sup>‡ab</sup> Huwei Li,<sup>ac</sup> Xinyu Fu,<sup>ab</sup> Hongxia Yue,<sup>ab</sup> Zheyu Li,<sup>ab</sup> Jing Feng,<sup>\*ab</sup> and Hongjie Zhang<sup>\*abd</sup>

<sup>a</sup> State Key Laboratory of Rare Earth Resource Utilization, Changchun Institute of Applied Chemistry, Chinese Academy of Sciences, Changchun 130022, China.

<sup>b</sup> School of Applied Chemistry and Engineering, University of Science and Technology of China, Hefei 230026, China

<sup>c</sup> College of Chemistry, Jilin University, Changchun 130012, China

<sup>d</sup> Department of Chemistry, Tsinghua University, Beijing 100084, China

<sup>‡</sup> These authors contributed equally and should be regarded as co-first authors.

**Keywords:** Halide double perovskite, Rare earth, Multicolor emissions, Anticounterfeiting, Light-emitting diodes

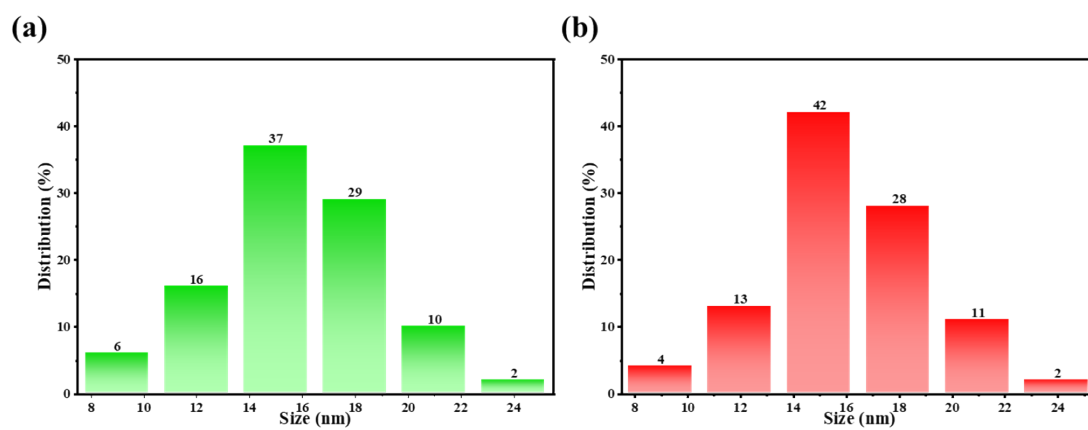

**Fig. S1** The size distribution histograms of  $\text{Cs}_2\text{NaTbCl}_6$  and  $\text{Cs}_2\text{NaEuCl}_6$  NCs.

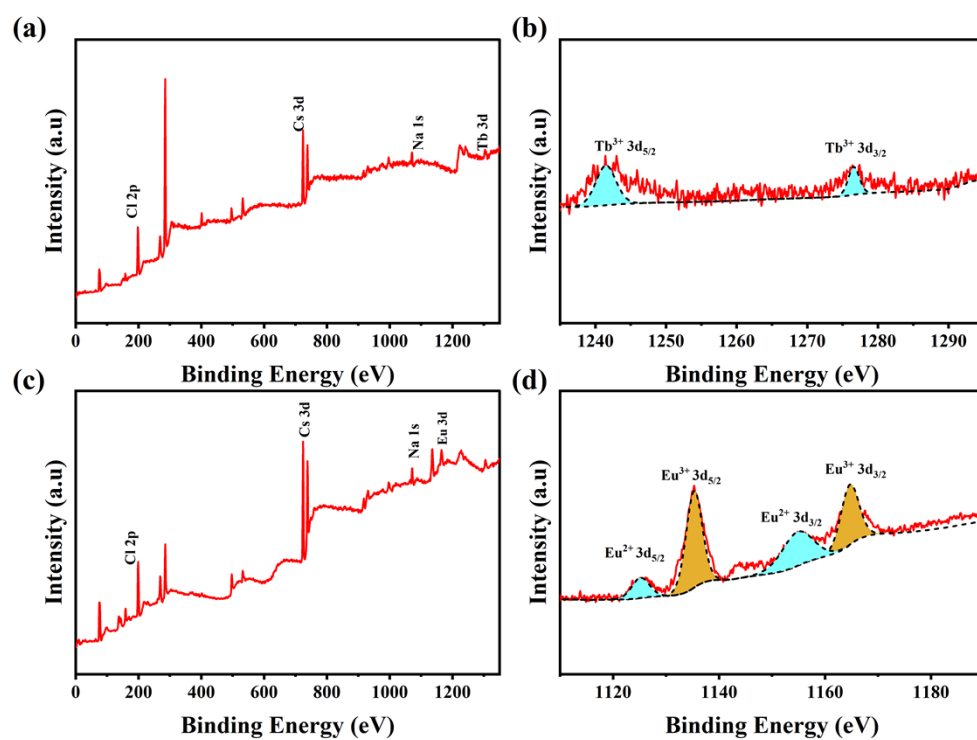

**Fig. S2** Survey XPS spectra of  $\text{Cs}_2\text{NaTbCl}_6$  (a) and  $\text{Cs}_2\text{NaEuCl}_6$  (c). High-resolution XPS spectra of  $\text{Cs}_2\text{NaTbCl}_6$  (b) and  $\text{Cs}_2\text{NaEuCl}_6$  (d).

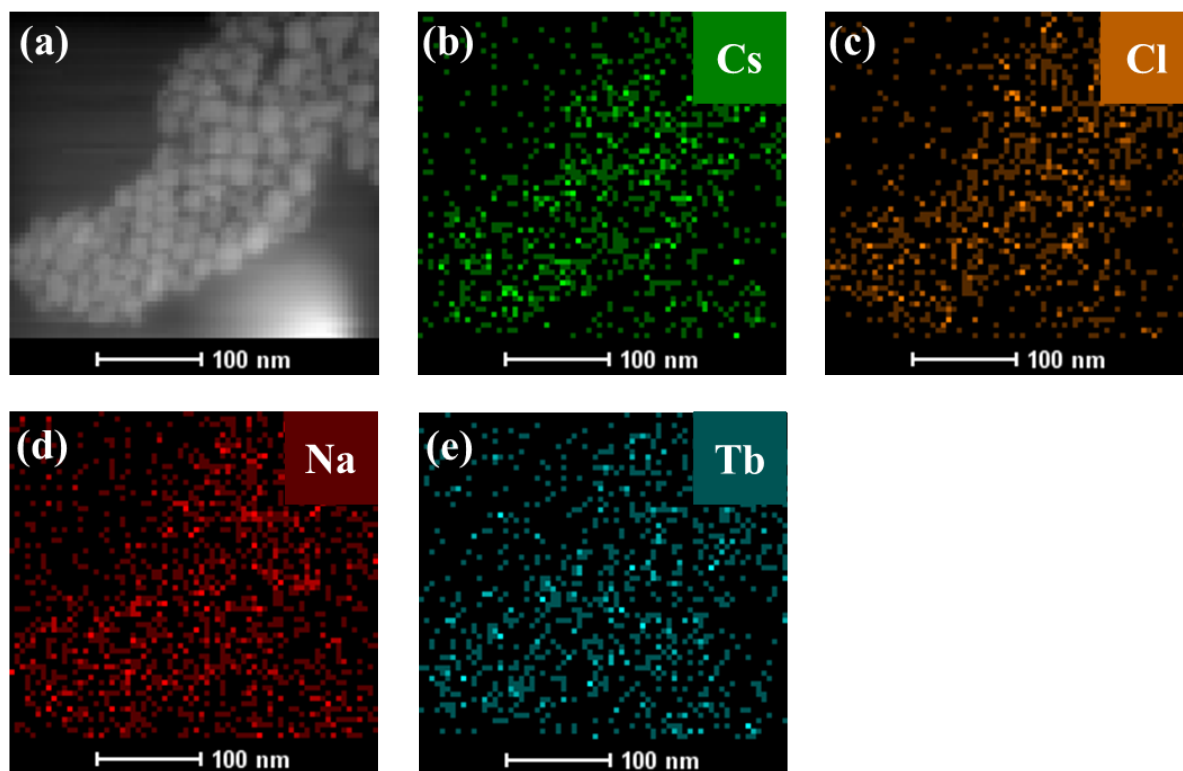

**Fig. S3** (a) High-angle annular dark-field (HAADF) image of  $\text{Cs}_2\text{NaTbCl}_6$  NCs. (b-e) STEM-EDS elemental mappings of Cs, Na, Tb and Cl elements colocalized in  $\text{Cs}_2\text{NaTbCl}_6$  NCs.

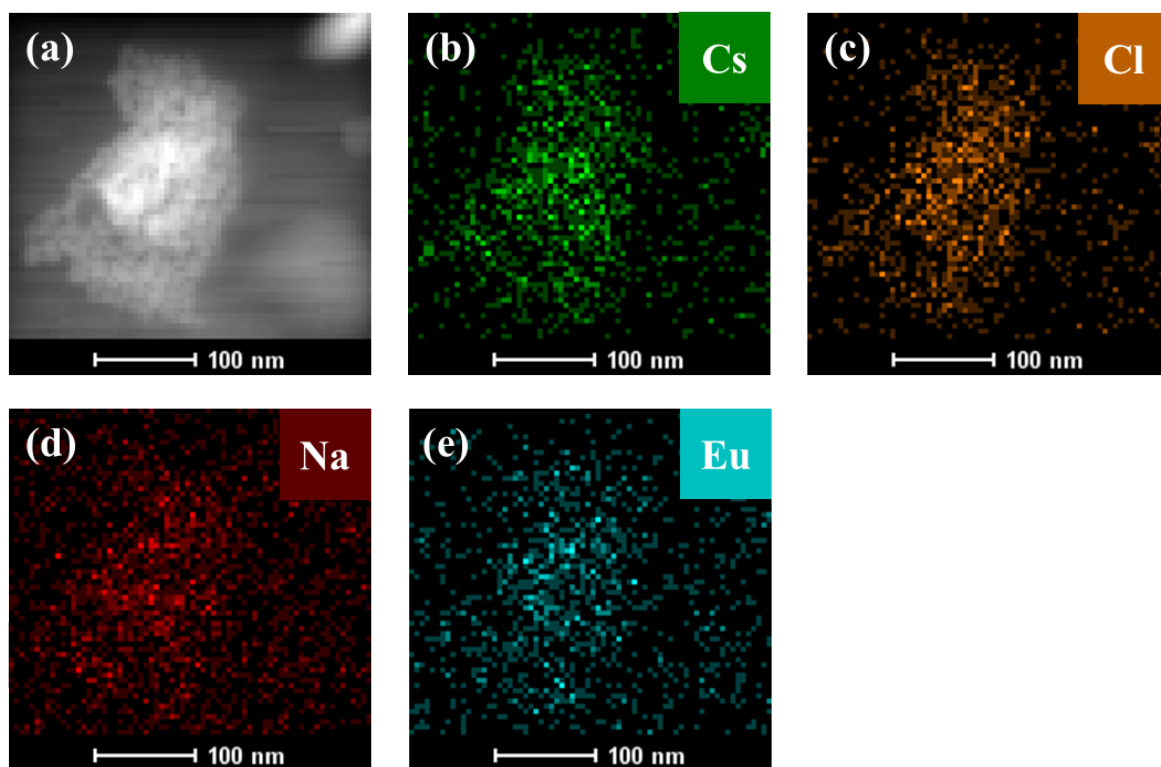

**Fig. S4** (a) High-angle annular dark-field (HAADF) image of  $\text{Cs}_2\text{NaEuCl}_6$  NCs. (b-e) STEM-EDS elemental mappings of Cs, Na, Eu, and Cl elements colocalized in  $\text{Cs}_2\text{NaEuCl}_6$  NCs.

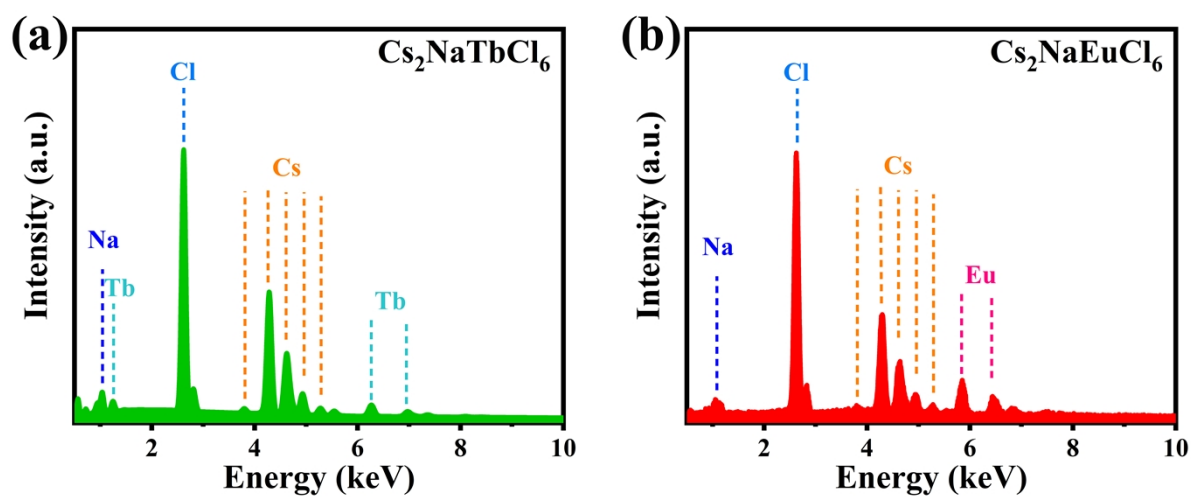

**Fig. S5** EDX spectra of (a)  $\text{Cs}_2\text{NaTbCl}_6$  and (b)  $\text{Cs}_2\text{NaEuCl}_6$  NCs.

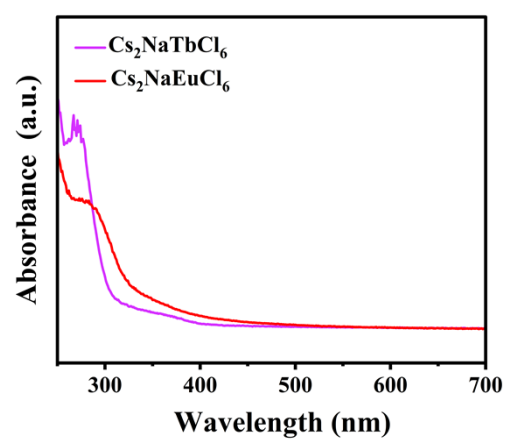

**Fig. S6** UV-vis absorption spectra of  $\text{Cs}_2\text{NaTbCl}_6$  and  $\text{Cs}_2\text{NaEuCl}_6$  NCs.

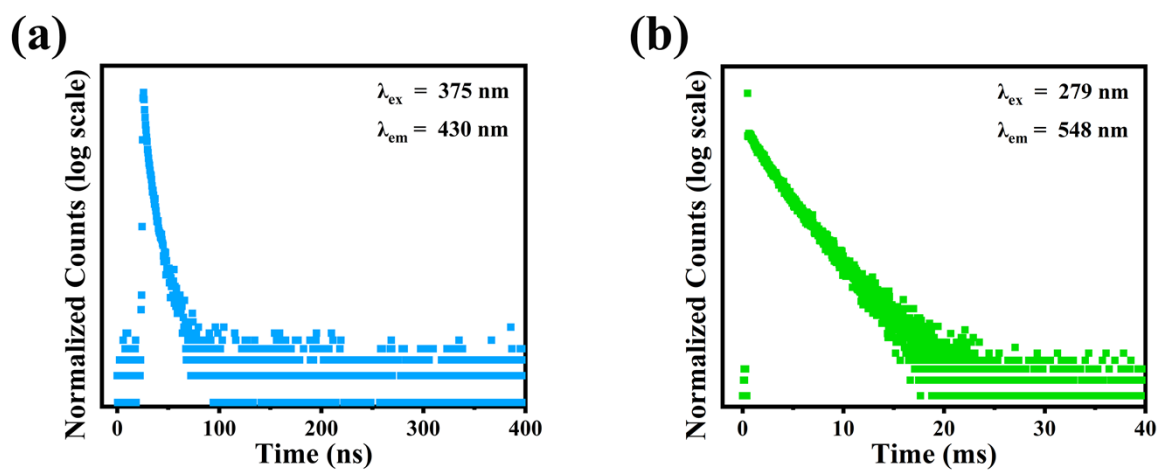

**Fig. S7** The PL decay curves of  $\text{Cs}_2\text{NaTbCl}_6$  NCs monitored at (a) 430 nm ( $\lambda_{\text{ex}} = 375$  nm) and (b) 548 nm ( $\lambda_{\text{ex}} = 279$  nm).

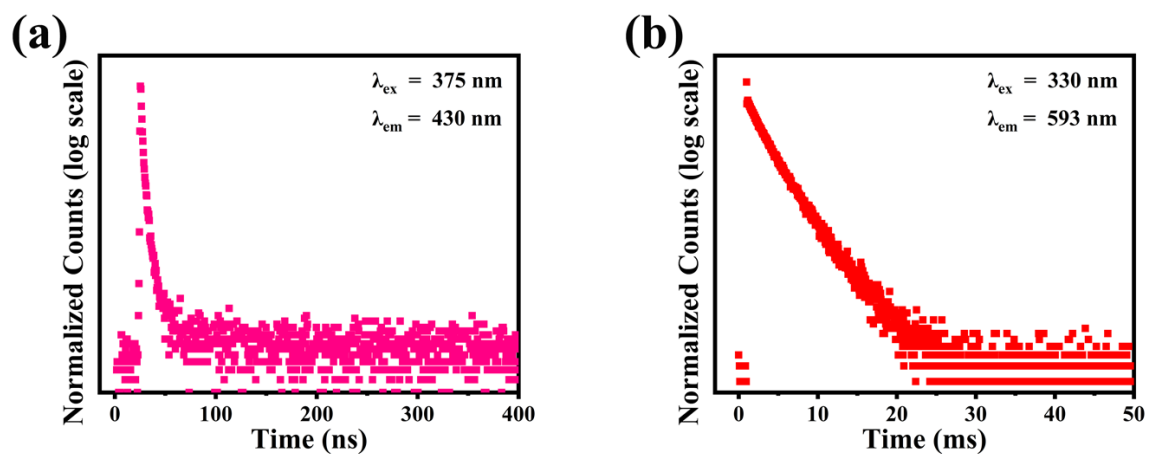

**Fig. S8** The PL decay curves of  $\text{Cs}_2\text{NaEuCl}_6$  NCs monitored at (a) 430 nm ( $\lambda_{\text{ex}} = 375$  nm) and (b) 593 nm ( $\lambda_{\text{ex}} = 330$  nm).

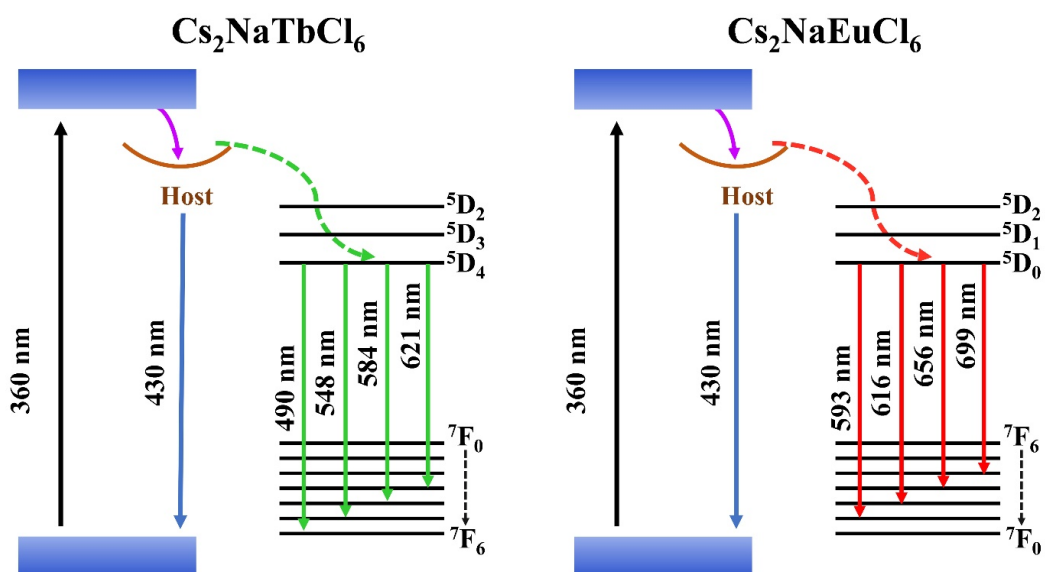

**Fig. S9** Schematic diagram of the possible luminescence mechanism of  $\text{Cs}_2\text{NaRECl}_6$  (RE = Tb, Eu) NCs.

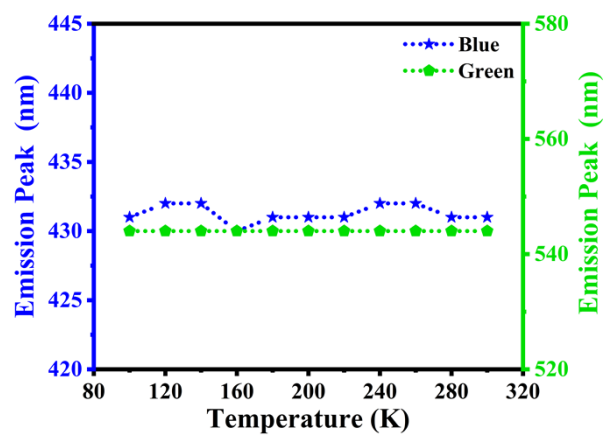

**Fig. S10** PL peak changes of Cs<sub>2</sub>NaTbCl<sub>6</sub> NCs under 360 nm excitation from 100-300 K (blue line: host emission, green line: Tb<sup>3+</sup> ions emission).

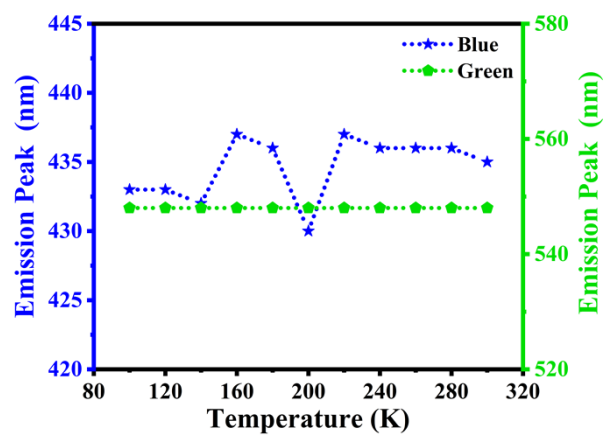

**Fig. S11** PL peak changes of Cs<sub>2</sub>NaTbCl<sub>6</sub> NCs under 279 nm excitation from 100-300 K (blue line: host emission, green line: Tb<sup>3+</sup> ions emission).

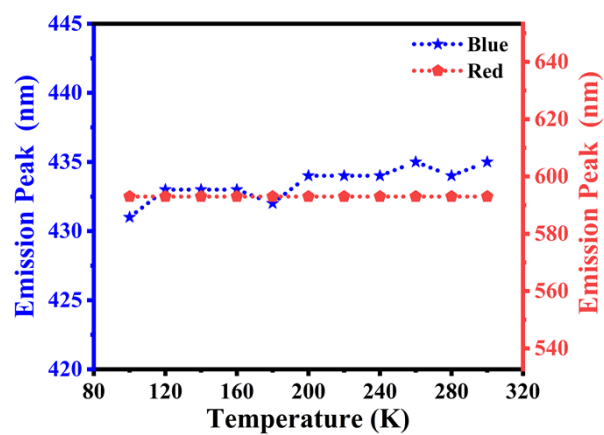

**Fig. S12** PL peak changes of Cs<sub>2</sub>NaEuCl<sub>6</sub> NCs under 360 nm excitation from 100-300 K (blue line: host emission, red line: Eu<sup>3+</sup> ions emission).

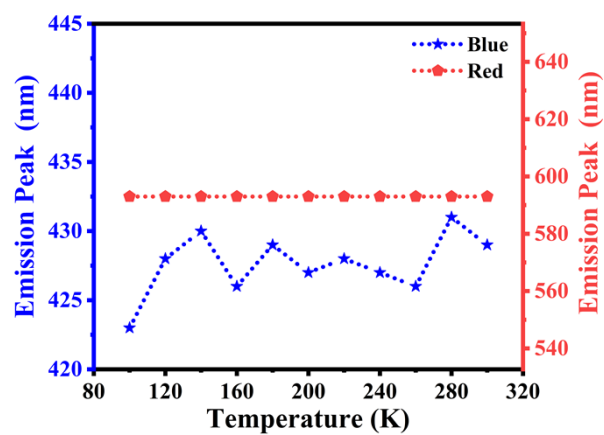

**Fig. S13** PL peak changes of  $\text{Cs}_2\text{NaEuCl}_6$  NCs under 330 nm excitation from 100-300 K (blue line: host emission, red line:  $\text{Eu}^{3+}$  ions emission).

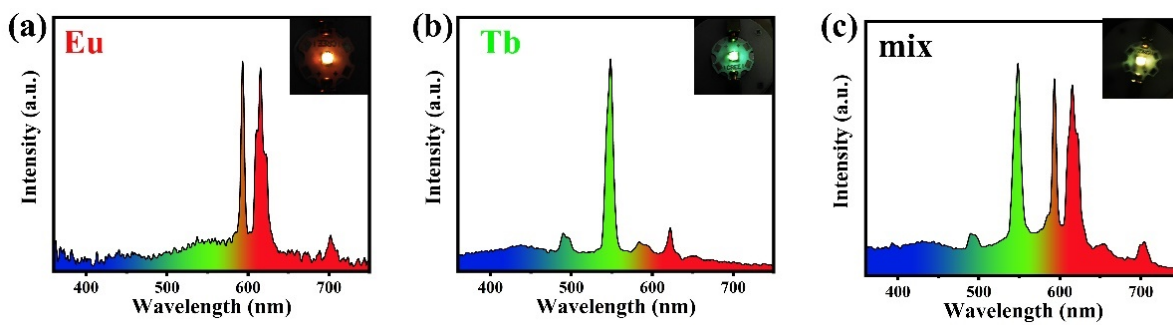

**Fig. S14** Electroluminescence spectra of the LED devices based on (a)  $\text{Cs}_2\text{NaEuCl}_6$  NCs, (b)  $\text{Cs}_2\text{NaTbCl}_6$  NCs, and (c)  $\text{Cs}_2\text{NaEuCl}_6$  and  $\text{Cs}_2\text{NaTbCl}_6$  NCs. The insets show the corresponding photographs of LED devices driven by 20 mA forward current.
